# Supplementary material for: Bacterial Secondary Metabolite Biosynthetic Potential in Soil Varies with Phylum, Depth, and Vegetation Type
Source: PubMed Central journal article supplement (PMC7298704; doi:10.1128/mbio.00416-20), 2020-06-16

Tree scale: 0.1

**Taxonomy**

- Euryarchaeota
- Thaumarchaeota
- Bathyarchaeota
- Planctomycetes
- Verrucomicrobia
- Alphaproteobacteria
- Gammaproteobacteria
- Betaproteobacteria
- Deltaproteobacteria
- Nitrospirae
- Rokubacteria
- Acidobacteria
- Eisenbacteria
- Latescibacteria
- Ignavibacteriae
- Bacteroidetes
- Gemmatimonadetes
- Saccharibacteria
- Doudnabacteria
- Parcubacteria
- Microgenomates
- Actinobacteria
- Armatimonadetes
- Chloroflexi
- Dormibacteraeota

**Biosynthetic Domains**

- KS domains
- CD domains

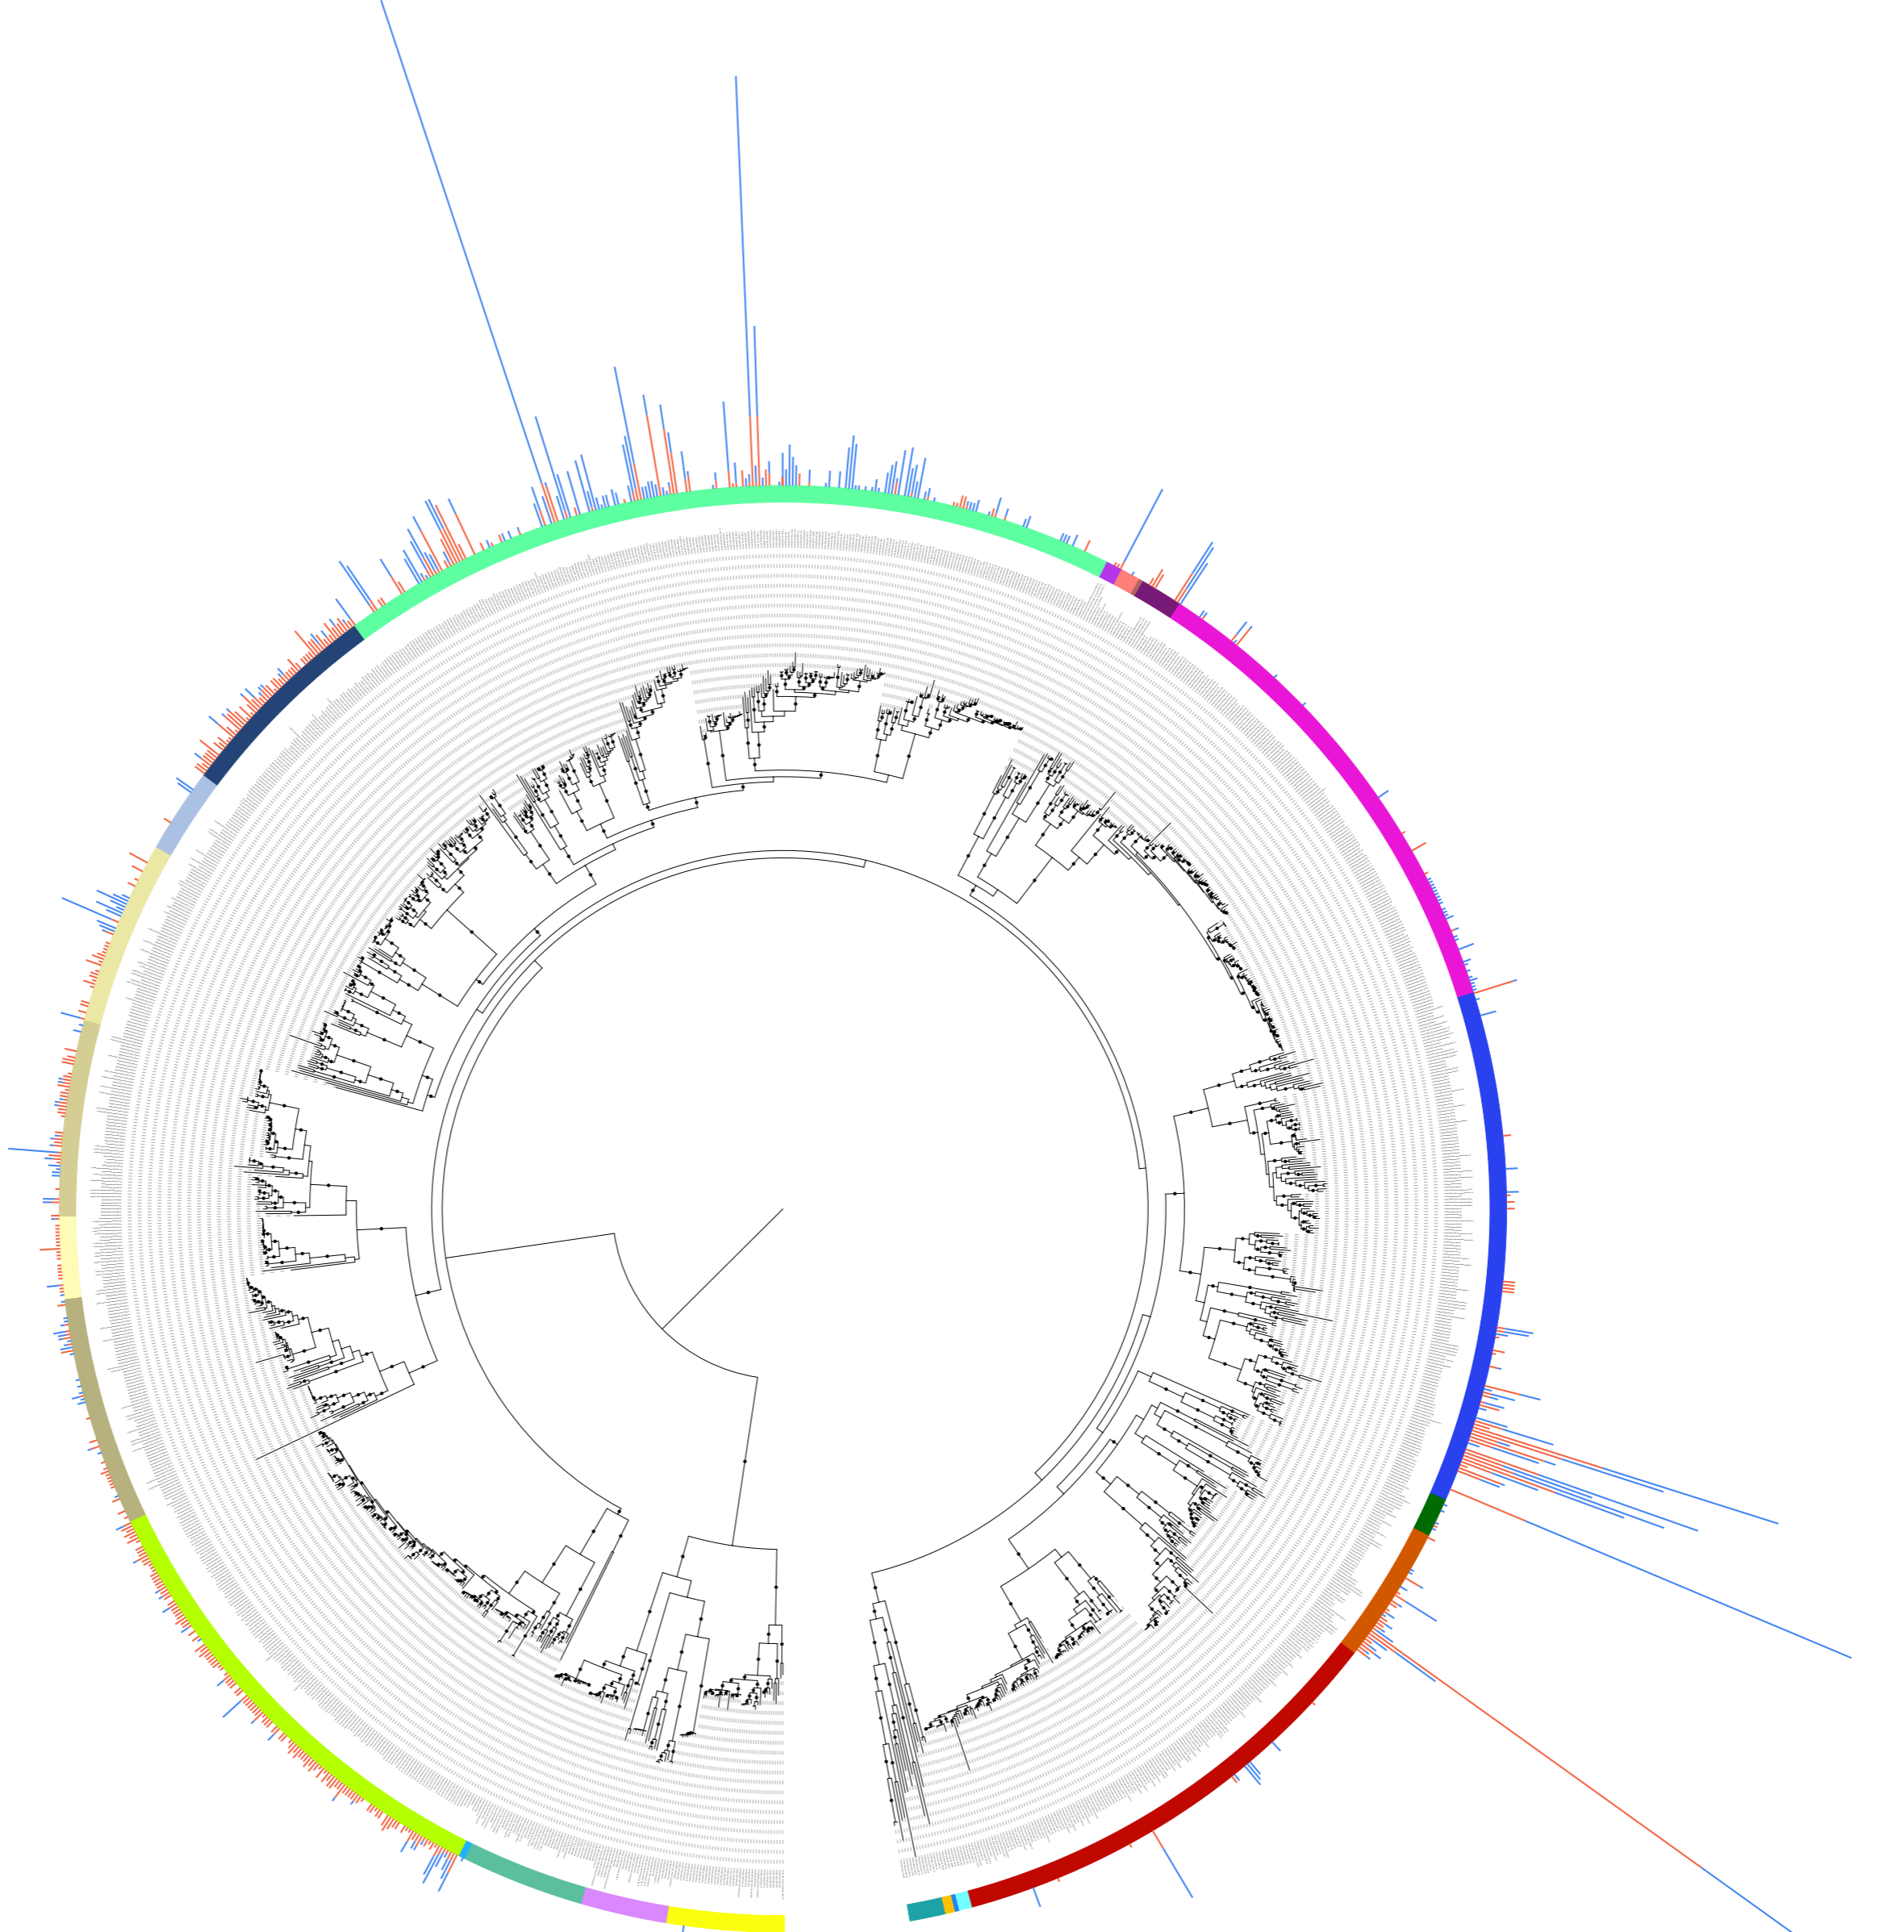

Supplement: mBio.00416-20-sf001.pdf [file mBio.00416-20-sf001.pdf]
