# Supplementary material for: Bacterial Secondary Metabolite Biosynthetic Potential in Soil Varies with Phylum, Depth, and Vegetation Type
Source: PubMed Central journal article supplement (PMC7298704; doi:10.1128/mbio.00416-20), 2020-06-16

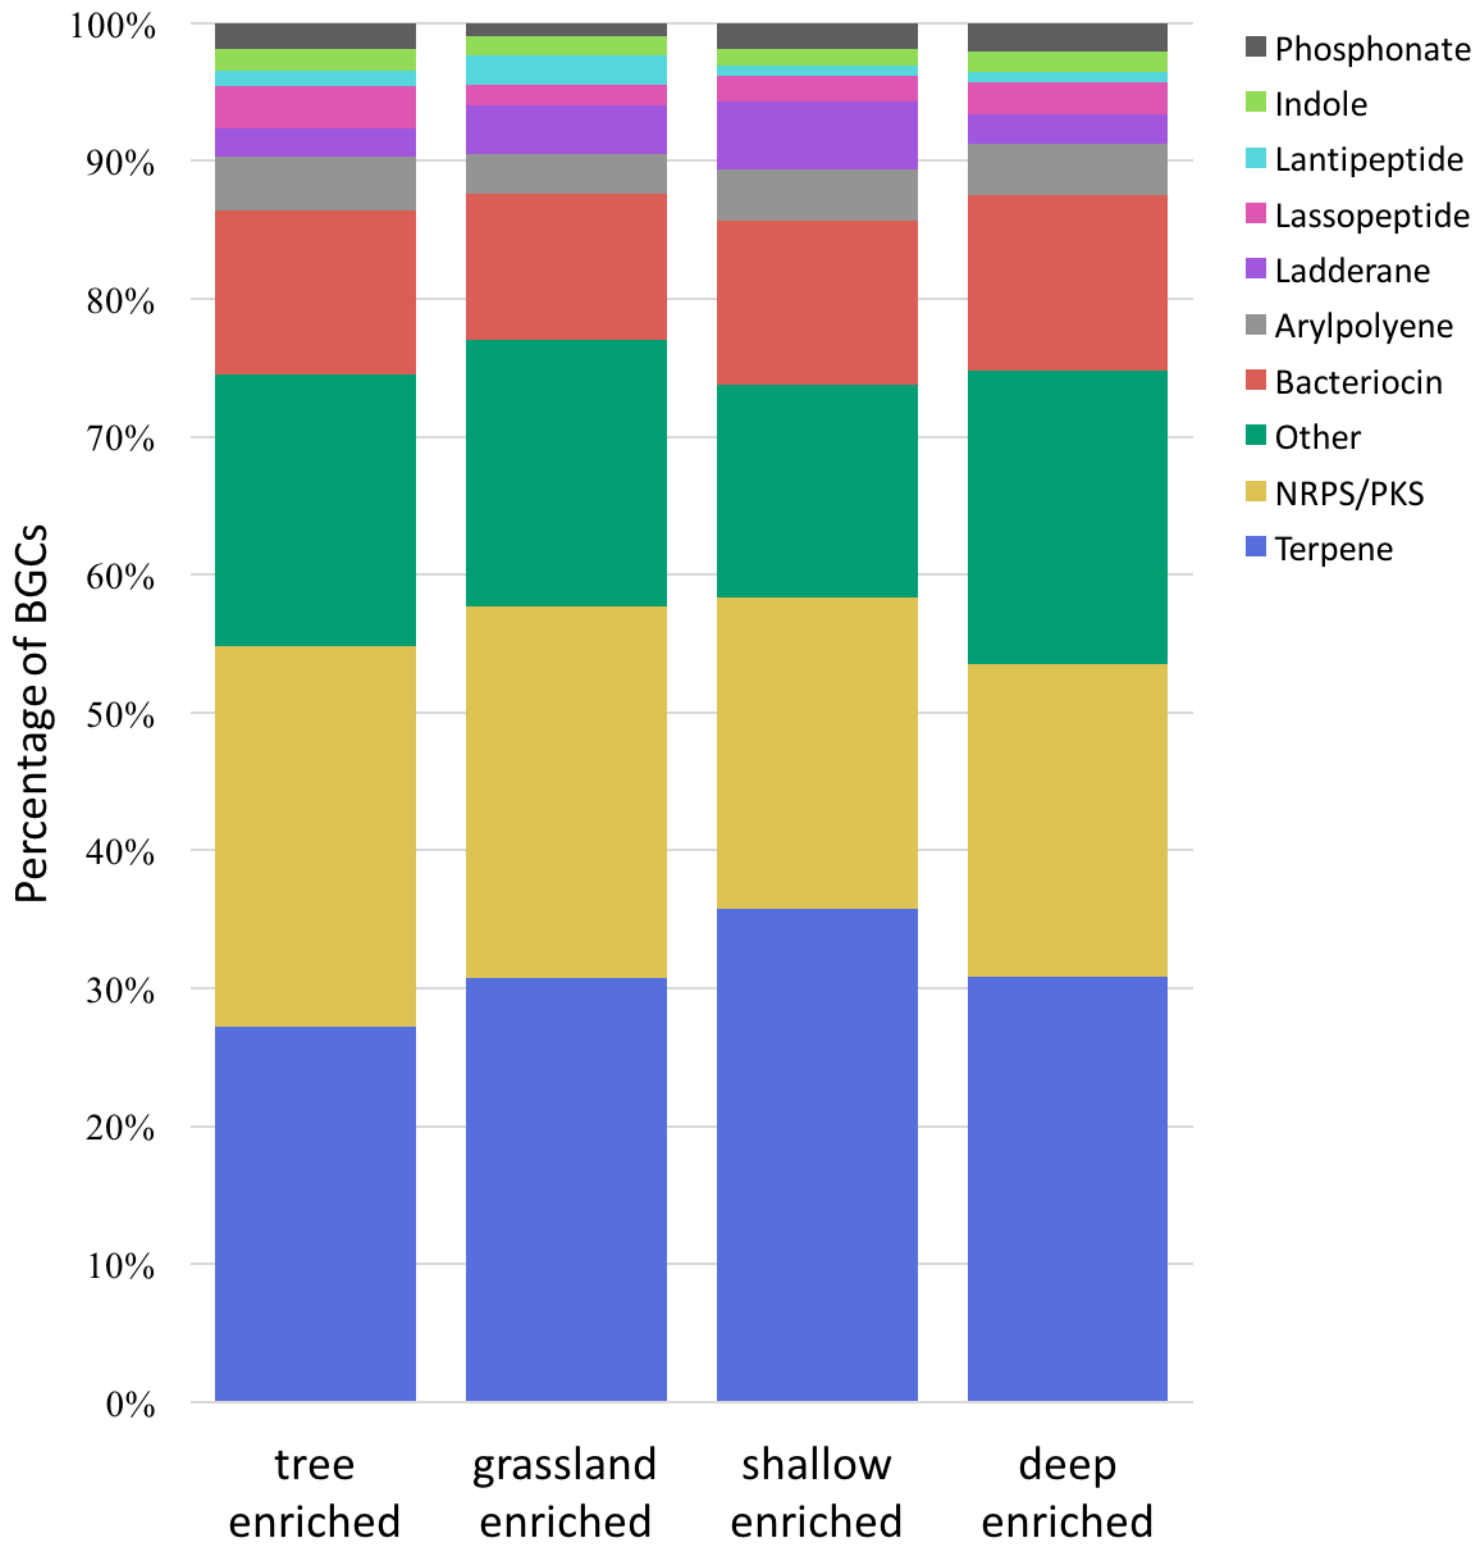

Supplement: mBio.00416-20-sf003.pdf [file mBio.00416-20-sf003.pdf]
